# Supplementary material for: Simultaneous enzyme mimicking and chemical reduction mechanisms for nanoceria as a bio-antioxidant: a catalytic model bridging computations and experiments for nanozymes
Source: Royal Society of Chemistry journal article supplement (doi:10.1039/c9nr03473k), 2019-01-01
Supplement: c9nr03473k1.pdf [file c9nr03473k1.pdf]

Electronic Supplementary Information  
for

**Simultaneous Enzyme Mimicking and Chemical  
Reduction Mechanisms for Nanoceria as  
Bio-Antioxidants: A Catalytic Model Bridging  
Computations and Experiments for Nanozymes**

Zhenzhen Wang,<sup>a,b</sup> Xiaomei Shen,<sup>a</sup> Xingfa Gao\*<sup>a</sup> and Yuliang Zhao,<sup>b</sup>

<sup>a</sup>College of Chemistry and Chemical Engineering, Jiangxi Normal University, Nanchang 330022, China, E-mail: gaox@jxnu.edu.cn

<sup>b</sup>CAS Key Laboratory for Biomedical Effects of Nanomaterials and Nanosafety & CAS Center for Excellence in Nanoscience, National Center for Nanoscience and Technology of China, Beijing 100190, China

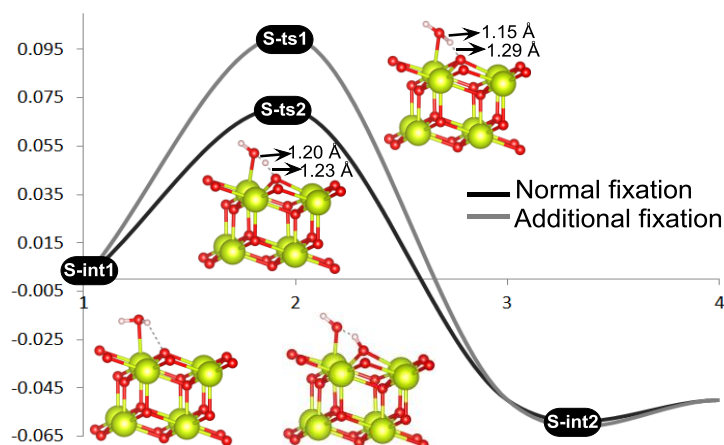

**Figure S1.** Energy profiles for the dissociative adsorption of  $\text{H}_2\text{O}$  on  $\text{CeO}_2$  (111) surface with the transition states calculated by two atom fixation schemes. In the normal fixation scheme, the top six-layer atoms of ceria as well as adsorbate atoms were allowed to relax; the bottom three-layer atoms and lattice parameters of ceria were frozen. In the additional fixation scheme, only adsorbate atoms were allowed to relax. The energy unit is eV.

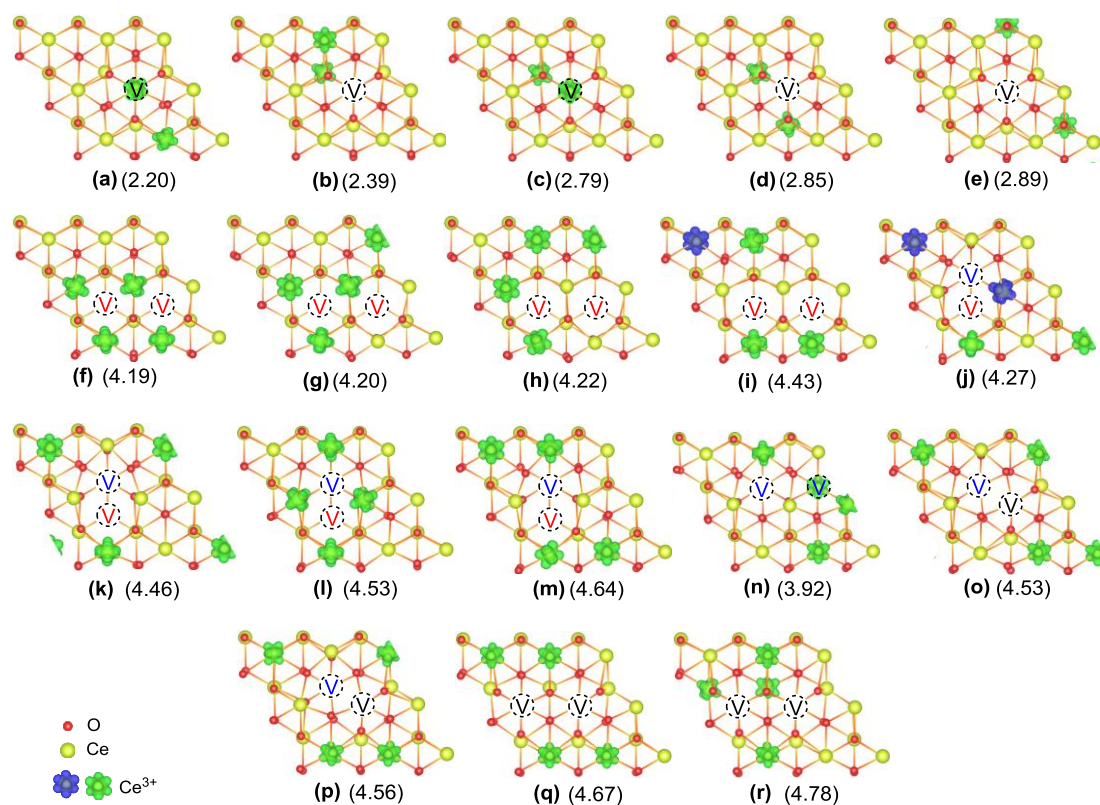

**Figure S2.** Spin density distribution  $\text{CeO}_2$  (111) containing single or double  $\text{O}_v$ : (a-e)  $\text{O}_{3c}$ , (f-i)  $\text{O}_{1a,1f}$ , (j-m)  $\text{O}_{1a,2b}$ , (n)  $\text{O}_{2b,2d}$ , (o, p)  $\text{O}_{2b,3c}$ , (q, r)  $\text{O}_{3c,3e}$ . The corresponding  $\text{O}_v$  formation energies (in eV) are marked in the parentheses. The isosurfaces ( $0.2 \text{ e}/\text{\AA}^3$ ) of spin-up and spin-down charge densities are in green and purple, respectively. The dotted circles represent  $\text{O}_v$ .

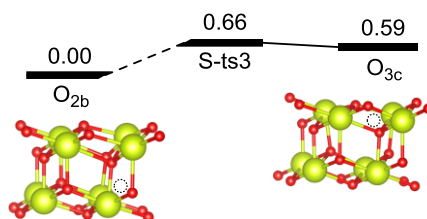

**Figure S3.** The energy profile of transformation between O<sub>2b</sub> and O<sub>3c</sub>. The energy unit is eV.

**Table S1.** Redox potentials for ceria structures with or without oxygen vacancies, derived from their calculated electronic band structures.

| structures <sup>a</sup> | $\varphi_1$ <sup>b</sup> | $\varphi_2$ <sup>c</sup> |
|-------------------------|--------------------------|--------------------------|
| CeO <sub>2</sub>        | 1.72                     | −0.50                    |
| O <sub>1a,1f</sub>      | 0.25                     | −0.80                    |
| O <sub>1a,2b</sub>      | 0.34                     | −0.77                    |
| O <sub>2b,2d</sub>      | 0.39                     | −0.69                    |
| O <sub>3c,3e</sub>      | 0.42                     | −0.51                    |
| O <sub>2b,3c</sub>      | 0.50                     | −0.59                    |
| O <sub>1a</sub>         | 0.66                     | −0.63                    |
| O <sub>2b</sub>         | 0.68                     | −0.67                    |
| O <sub>3c</sub>         | 0.75                     | −0.46                    |

<sup>a</sup> For structures, see Figure 2 and Figure 3; <sup>b</sup> ceria as the electron donors, for which  $\varphi_1$  correspond to the energies of the HOMOs; <sup>c</sup> ceria as electron acceptors, for which  $\varphi_2$  correspond to the energies of the LUMOs.

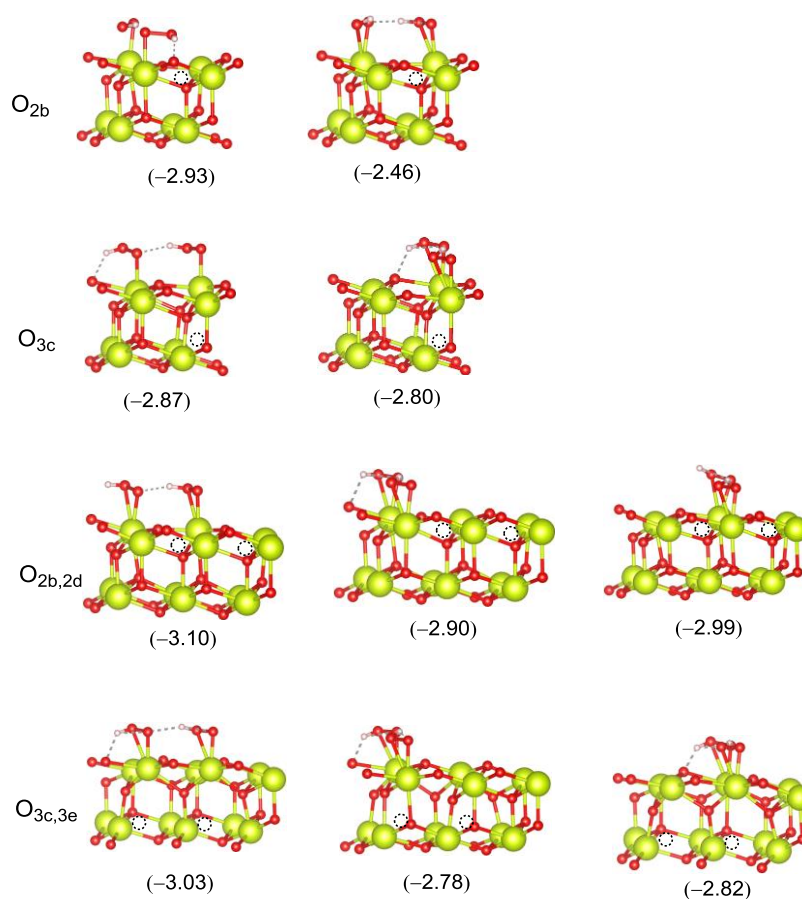

**Figure S4.** The optimized structures for ceria with two adsorbed  $\text{HO}_2^\bullet$  radicals with different adsorption positions; the adsorption energies are given in the parentheses. The energy unit is eV.

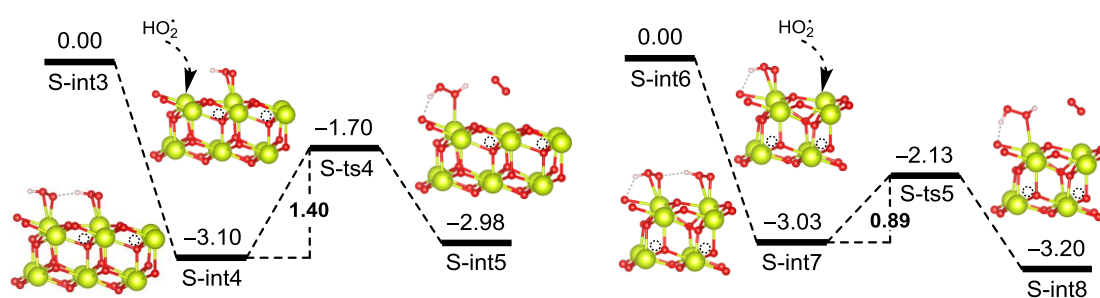

**Figure S5.** The energy profiles for the SOD mimetic mechanisms of  $\text{O}_{2b,2d}$  and  $\text{O}_{3c,3e}$ . The energy unit is eV.

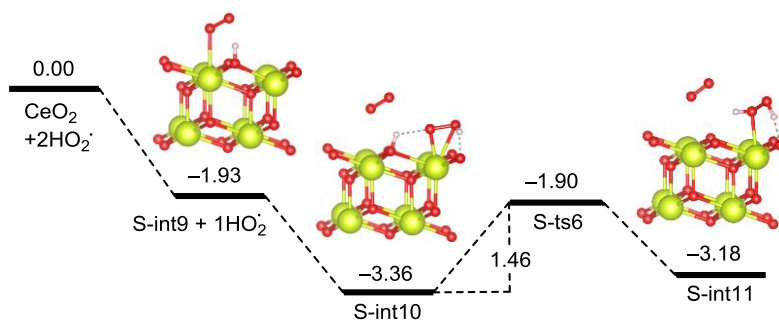

**Figure S6.** The energy profiles for the SOD mimetic mechanism of  $\text{CeO}_2$  (111). The energy unit is eV.

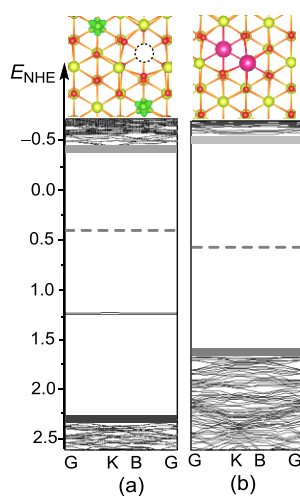

**Figure S7.** Electronic structures for  $\text{O}_{2b}$  (a) and  $\text{O}_{2b}$  with two Ce atoms substituted by Sm (b). In (b), the two SDSs disappear after the Sm substitutions.

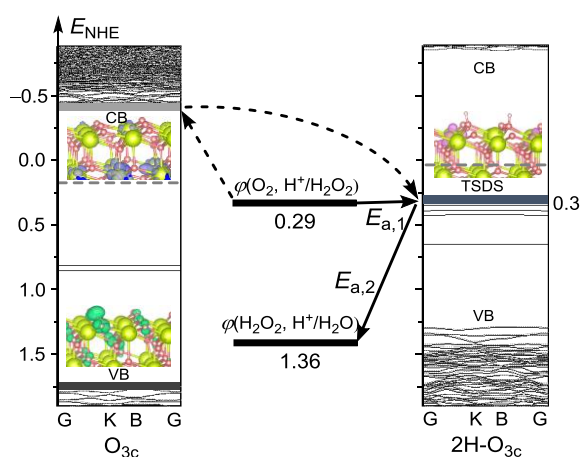

**Figure S8.** Electronic band structures for  $\text{O}_{3c}$  and intermediate  $2\text{H-O}_{3c}$ .  $E_{\text{TSDS}}$  of  $2\text{H-O}_{3c}$  is not located in between  $\varphi(\text{O}_2, \text{H}^+/\text{H}_2\text{O}_2)$  and  $\varphi(\text{H}_2\text{O}_2, \text{H}^+/\text{H}_2\text{O})$ , in agreement with that reduced nanoceria has poor CAT mimetic activity.
